# Supplementary material for: Antimicrobials tethering on suture surface through a hydrogel: a novel strategy to combat postoperative wound infections
Source: Royal Society of Chemistry journal article supplement (doi:10.1039/c7ra04888b), 2017-01-01
Supplement: c7ra04888b1.pdf [file c7ra04888b1.pdf]

### Supplementary material

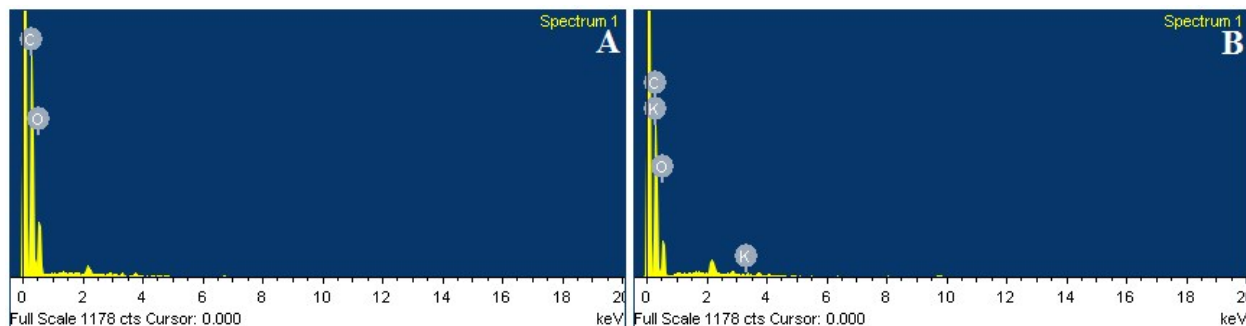

**Supplementary Fig.S1:** Elemental analysis of non coated *Philosamia ricini* waste suture (PRWS) and coated *Philosamia ricini* waste suture (PRWS) by using Energy-dispersive X-ray spectroscopy (EDX)

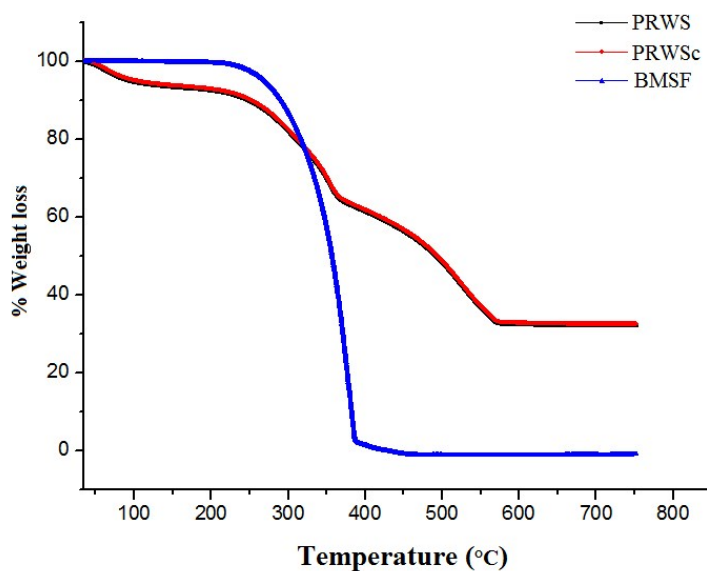

**Supplementary Fig.S2:** Thermal stability analysis of BMSF, non coated *Philosamia ricini* waste suture (PRWS), and coated *Philosamia ricini* suture (PRWSc) using TGA

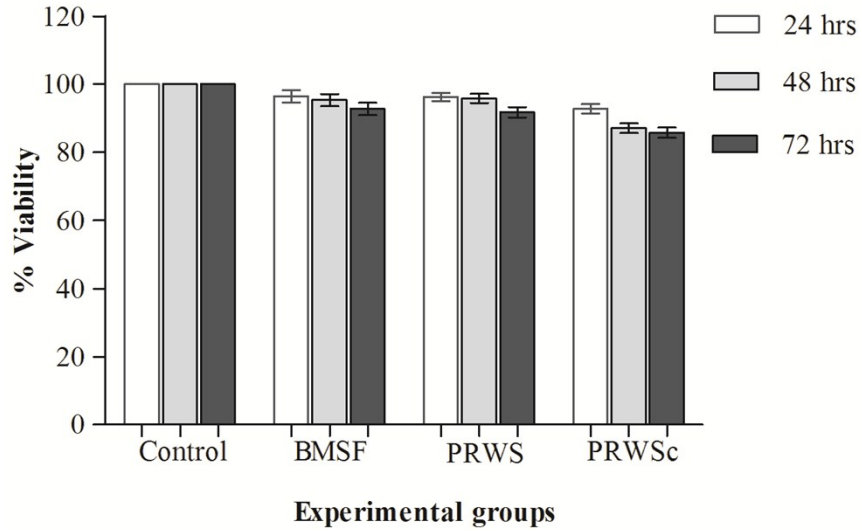

**Supplementary Fig.S3:** Graphical representation of MTT assay results for BMSF, non coated *Philosamia ricini* waste suture (PRWS), and coated *Philosamia ricini* suture (PRWSc) along with the positive control at 24 hrs, 48 hrs, and 72 hrs

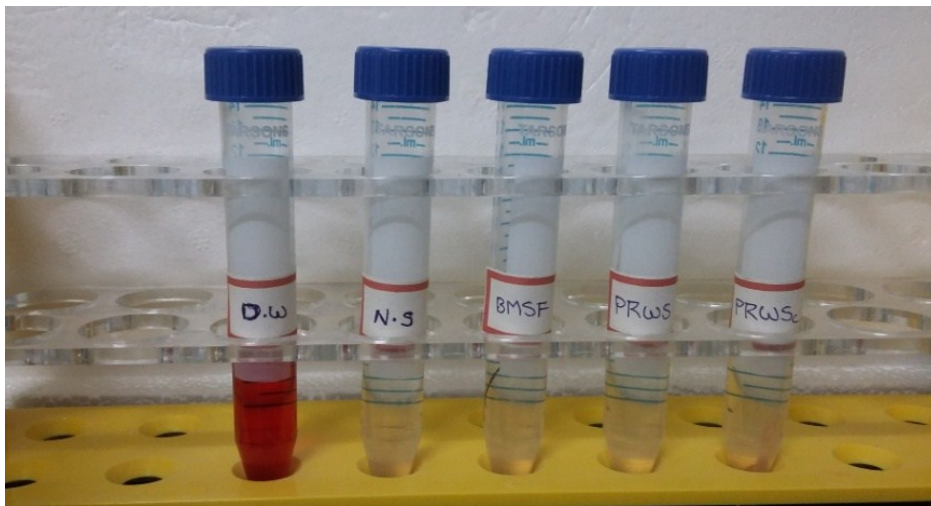

**Supplementary Fig S4:** Study of hemolytic potential of distilled water (DW), normal saline (NS), BMSF, non coated *Philosamia ricini* waste suture (PRWS), and coated *Philosamia ricini* suture (PRWSc)

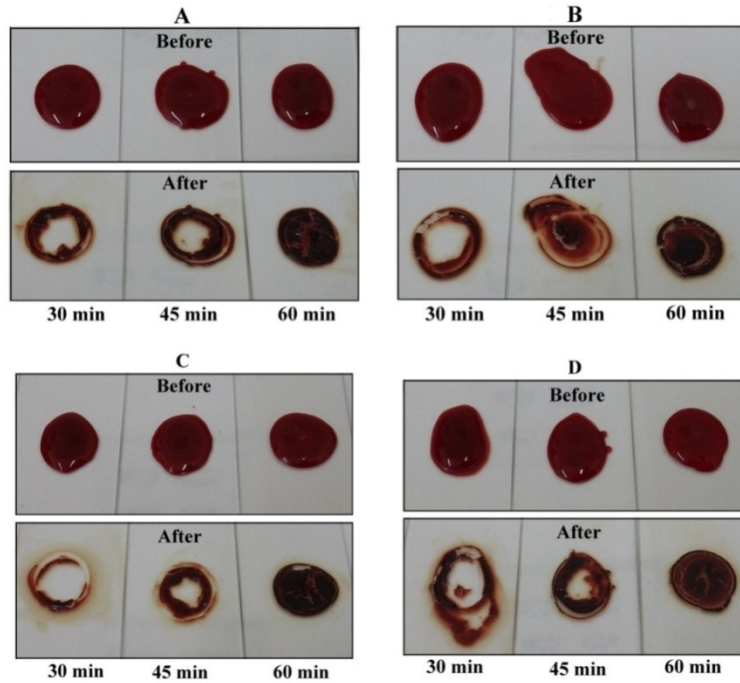

**Supplementary Fig S5:** Images showing *in vitro* antithrombogenic property evaluated for control (A), BMSF (B), non coated *Philosamia ricini* waste suture (PRWS) (C), and coated *Philosamia ricini* suture (PRWSc) (D) at blood clotting time of 30, 45 and 60 min (n=3)

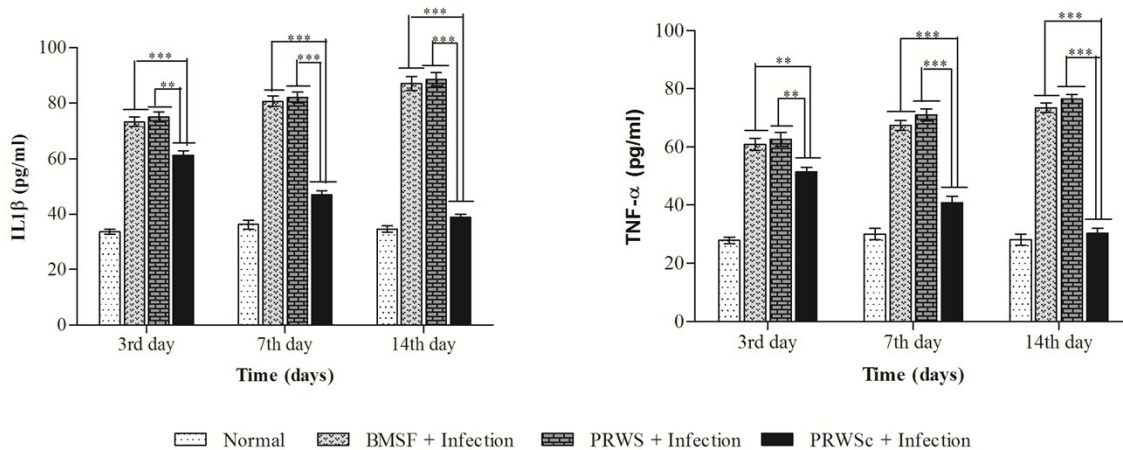

**Supplementary Fig S6:** Changes in the levels of serum inflammatory cytokine IL-1β and TNF-α at 3<sup>rd</sup>, 7<sup>th</sup>, and 14<sup>th</sup> post operative day of *S. aureus* infected animals sutured with BMSF, non coated *Philosamia ricini* waste suture (PRWS), and coated *Philosamia ricini* suture (PRWSc) in comparison to control animals. The values are expressed as mean ± standard deviation (n=6). At 14<sup>th</sup> day of infection IL-1β and TNF-α levels significantly decreased ((\*\*\*)p<0.001) in PRWSc sutured animal

**Supplementary Table S1:** Degradation study of sutures (BMSF, PRWS and PRWSc) in terms of percentage loss in dry weight and tensile strength after 14 days of incubation.

| <b>Suture material</b> | <b>% loss in dry weight</b> | <b>% loss in tensile strength</b> |
|------------------------|-----------------------------|-----------------------------------|
| <b>BMSF</b>            | 8.2 ± 1                     | 6.5 ± 1.1                         |
| <b>PRWS</b>            | 9 ± 1.32                    | 7.01 ± 1                          |
| <b>PRWSc</b>           | 10.99 ± 2                   | 7.32 ± 1.2                        |

All the results were expressed in mean ± S.D (n=3). PRWS: Non-coated *Philosamia ricini* waste suture; PRWSc: coated *Philosamia ricini* waste suture.
